# Supplementary material
Source: MDPI journal article supplement (https://www.mdpi.com/2073-4352/11/4/451)
Supplement: s1 [file s1]

# Structure-Properties-Correlation of Cross-Linked Penicillin G Acylase Crystals

Marta Kubiak <sup>1,\*</sup>, Janine Mayer <sup>2,\*</sup>, Ingo Kampen <sup>1</sup>, Carsten Schilde <sup>1</sup> and Rebekka Biedendieck <sup>2,\*</sup>

Table S1: Summary of mechanical properties of CLECs

| Enzyme crystal | Specifics                                  | Measuring method               | Results / MPa                    |                 | Literature |
|----------------|--------------------------------------------|--------------------------------|----------------------------------|-----------------|------------|
|                |                                            |                                | Hardness                         | Young's modulus |            |
| Lysozyme       | Native, wet tetragonal crystals            | micro-Vickers hardness         | 2 - 20                           |                 | [10,11,13] |
| Lysozyme       | Native, wet orthorhombic crystals          | micro-Vickers hardness         | 6 - 10                           | -               | [12]       |
| Lysozyme       | Native, wet tetragonal crystals            | Nanoindenter                   | 15                               | 490             | [14]       |
| Lysozyme       | Native, dry tetragonal crystals            | Nanoindenter                   | 200                              | 4200            | [14]       |
| Lysozyme       | Cross-linked triclinic crystals            | mechanical resonance technique | -                                | 290 - 1400      | [15]       |
| Lysozyme       | Cross-linked tetragonal crystals in liquid | AFM Nanoindentation            | 11                               | 1000            | [16]       |
| HheG           | Cross-linked hexagonal crystals in liquid  | AFM Nanoindentation            | 9                                | 500             | [16]       |
| HheG           | Cross-linked anisotropic crystal faces     | AFM Nanoindentation            | Vary with the cross-linking time |                 | [17]       |

## References (Numbered according to the main paper):

- Koizumi, H.; Kawamoto, H.; Tachibana, M.; Kojima, K. Effect of intracrystalline water on micro-Vickers hardness in tetragonal hen egg-white lysozyme single crystals. *J. Phys. D. Appl. Phys.* **2008**, *41*, 074019.
- Tachibana, M.; Kobayashi, Y.; Shimazu, T.; Ataka, M.; Kojima, K. Growth and mechanical properties of lysozyme crystals. *J. Cryst. Growth* **1999**, *198–199*, 661–664.
- Suzuki, R.; Kishi, T.; Tsukashima, S.; Tachibana, M.; Wako, K.; Kojima, K. Hardness and slip systems of orthorhombic hen egg-white lysozyme crystals. *Philos. Mag.* **2016**, *96*, 2930–2942.
- Kishi, T.; Suzuki, R.; Shigemoto, C.; Murata, H.; Kojima, K.; Tachibana, M. Microindentation Hardness of Protein Crystals under Controlled Relative Humidity. *Crystals* **2017**, *7*, 339.
- Tait, S.; White, E.T.; Litster, J.D. Mechanical Characterization of Protein Crystals. *Part. Part. Syst. Charact.* **2008**, *25*, 266–276.
- Morozov, V.N.; Morozova, T.Y. Viscoelastic properties of protein crystals: Triclinic crystals of

- hen egg white lysozyme in different conditions. *Biopolymers* **1981**, *20*, 451–467.
16. Kubiak, M.; Solarczek, J.; Kampen, I.; Schallmey, A.; Kwade, A.; Schilde, C. Micromechanics of anisotropic cross-linked enzyme crystals. *Cryst. Growth Des.* **2018**, *18*, 5885–5895.
  17. Kubiak, M.; Storm, K.F.; Kampen, I.; Schilde, C. Relationship between Cross-Linking Reaction Time and Anisotropic Mechanical Behavior of Enzyme Crystals. *Cryst. Growth Des.* **2019**, *19*, 4453–4464.
